# Supplementary material for: Improving validation methods for molecular diagnostics: application of Bland-Altman, Deming and simple linear regression analyses in assay comparison and evaluation for next-generation sequencing
Source: PubMed Central journal article supplement — J Clin Pathol. 2017 Jul 26;71(2):117–24. doi: 10.1136/jclinpath-2017-204520 (PMC5800325; doi:10.1136/jclinpath-2017-204520), 2017-07-26
Supplement: jclinpath-2017-204520supp001.pdf [file jclinpath-2017-204520supp001.pdf]

```
#Adapted from 'mcr' package: https://CRAN.R-project.org/package=mcr (Last accessed Oct 13, 2016)
```

```
calcDiff <- function(X,Y,EPS=1E-12) {  
  dRes <- X-Y  
  dRes[abs(dRes)<EPS*(abs(X)+abs(Y))/2] <- 0  
  return(dRes)  
}
```

```
#Adapted from 'mcr' package: https://CRAN.R-project.org/package=mcr (Last accessed Oct 13, 2016)
```

```
deming<-function(X, Y, error.ratio)
```

```
{  
  # Check validity of parameters  
  
  stopifnot(!is.na(X))  
  stopifnot(!is.na(Y))  
  stopifnot(is.numeric(X))  
  stopifnot(is.numeric(Y))  
  stopifnot(length(X)==length(Y))  
  stopifnot(length(X) > 0)  
  stopifnot(!is.na(error.ratio))  
  stopifnot(is.numeric(error.ratio))  
  stopifnot(error.ratio>0)  
  stopifnot(length(error.ratio) > 0)
```

```
#--
```

```
n <- length(X)
```

```
mX <- mean(X)
```

```

mY <- mean(Y)
u <- sum((X-mX)^2)
q <- sum((Y-mY)^2)
p <- sum((X-mX)*(Y-mY))
r <- p/sqrt(u*q)

## Estimated points

# [ Ref. K.Linnet. Estimation of the linear relationship between
#   the measurements of two methods with Proportional errors.
#   STATISTICS IN MEDICINE, VOL. 9, 1463-1473 (1990)].
#

b1 <- ((error.ratio*q-u)+sqrt((u-error.ratio*q)^2+4*error.ratio*p^2))/(2*error.ratio*p)
b0 <- mean(Y)-b1*mean(X)

## Standard error

# [Ref. Strike, P. W. (1991) Statistical Methods in Laboratory Medicine.
#   Butterworth-Heinemann, Oxford ].

se.b1 <- sqrt(b1^2*(calcDiff(1,r^2)/r^2)/(n-2))
se.b0 <- sqrt(se.b1^2*mean(X^2))

return(list(b0=b0, b1=b1, se.b0=se.b0, se.b1=se.b1, xw=mX, weight=rep(1,length(X))))
}

```

```

# Adapted from:

# Bland-Altman plot R function.

# Author: jmmateos@mce.hggm.es

###BA plot function - assay comparison###

baplot <- function(m1, m2, l1, l2, title,...) {

  # Assign values to "m1" and "m2" to compare
  means <- (m1 + m2) / 2

  diffs <- m1 - m2

  mdiff <- mean(diffs)

  sddiff <- sd(diffs)

  #Compute the figure limits

  ylimh <- mdiff + 3 * sddiff

  yliml <- mdiff - 3 * sddiff

  #Plot data

  plot(diffs ~ means, xlab = "Average signal", pch=16, col="grey",

       #main=paste0("Bland-Altman analysis of ",l1," and ",l2),

       ylab = paste0("Signal differences (",l1," - ",l2,")"),

       ylim = c(yliml, ylimh), cex.main=1, cex.lab=1

       ,main=title

       #,xaxt='n',

       #yaxt='n'

  )

  #diplay 0 bias horizontal line

```

```

abline(h=0)

#display calculated bias line

abline(h = mdiff, col="blue", lwd=2) # Center line

abline(lm(diffs~means), col="red", lwd=3, lty=3)

# Plot standard deviations lines

abline(h = mdiff + 1.96 * sddiff, lty = 2, lwd=2)

abline(h = mdiff - 1.96 * sddiff, lty = 2, lwd=2)

#display degree of agreement

text(0.25*max(means), ylimh*0.85, label=paste0("Degree of agreement:\n",abs(signif(sddiff*1.98, 3)),
units"), cex=1, font=2)

# plotting bias p value

pval <- t.test(diffs, mu=0)$p.value

# strip to 3 significant digits

pval <- signif(pval, 3)

# add asterisk if <0.05

pval <- ifelse(pval<0.001, "< 0.001",
              ifelse(pval<0.01, "< 0.01",
                    ifelse(pval<0.05, "< 0.05", "> 0.05")))

# annotate it near lower left corner

text(0.55*max(means), ylimh*0.85,paste0("Constant error:\n",abs(signif(mdiff,3)), " units \n(blue
line)\np ", pval), cex=1, font=2)

# systematic error

systematic<-coef(summary.lm(lm(diffs~means)))[2,1]

pval<- coef(summary.lm(lm(diffs~means)))[2,4]

pval <- ifelse(pval<0.001, "< 0.001",
              ifelse(pval<0.01, "< 0.01",
                    ifelse(pval<0.05, "< 0.05", "> 0.05")))

```

```

        ifelse(pval<0.05, "< 0.05", "> 0.05"))
pval <- paste0("Proportional error:\n",abs(signif(systematic, 3))," units\n(red line)\np ", pval)
text(0.85*max(means), ylimh*0.85,label=pval, cex=1, font=2)
}

#####

#Assay comparison script using Deming reg.

assay.metrics <- function(assay1, assay2, name1, name2, title, ...) {

  lm1<-deming(assay1,assay2,error.ratio=1)

  se.b1<-lm1$se.b1

  slope<-lm1$b1

  b1<-1-lm1$b1

  b0<-lm1$b0

  plot(assay1, assay2, pch=16, col="grey", xlab=name1, ylab=name2, main=title, cex.main=1, cex.lab=1,
        xlim=c(min(assay1,assay2),max(assay1,assay2)),
        ylim=c(min(assay1,assay2),max(assay1,assay2)))

  #add assay1 line

  abline(0,1,col="black", lwd=2)

  #add assay2 line

  abline(a=b0,b=slope, col="red", lwd=3, lty=3)

  #Dem. reg.

```

```

#display p value for the accuracy metric
pval<-t.test(assay2, assay1, paired=TRUE)$p.value
text(max(assay1)*0.35,ifelse(max(assay2)>max(assay1),max(assay2), max(assay1))*0.9,
      paste0("Constant error: ", abs(signif(mean(assay2)-mean(assay1),3)), " units (p ",
            ifelse(pval<0.001, "< 0.001",
                  ifelse(pval<0.01, "< 0.01",
                        ifelse(pval<0.05, "< 0.05", "> 0.05"))), ")), cex=1, font=2)

#systematic error (possibly not needed)
tstats <- (1-b1/se.b1)
# Calculates two tailed probability
pval<- 2 * pt(abs(tstats), df = length(x)-2, lower.tail = FALSE)

text(max(assay1)*0.35,ifelse(max(assay2)>max(assay1),max(assay2), max(assay1))*0.8,
      paste0("Proportional error: ", signif(b1, 3), " units (p ",
            ifelse(pval<0.001, "< 0.001",
                  ifelse(pval<0.01, "< 0.01",
                        ifelse(pval<0.05, "< 0.05", "> 0.05"))), ")), cex=1, font=2)

text(max(assay1)*0.35,ifelse(max(assay2)>max(assay1),max(assay2), max(assay1))*0.7,
      paste0("Deming: y = ", signif(1-b1, 3), "x ",ifelse(b0<0, "- ",
            ifelse(b0>0, "+ ")), signif(abs(b0), 3)), cex=1, font=2)

}

```

```

#####PRECISION AND ACCURACY FOR SPIKE-AND-RECOVERY
EXPERIMENTS#####

```

```

# Adapted from:

# Bland-Altman plot R function.

# Author: jmmateos@mce.hggm.es

baplot <- function(m1, m2, l1, l2, title, ...) {

  # Assign values to "m1" and "m2" to compare

  means <- (m1 + m2) / 2

  diffs <- m1 - m2

  mdiff <- mean(diffs)

  sddiff <- sd(diffs)

  #Compute the figure limits

  ylimh <- mdiff + 3 * sddiff

  yliml <- mdiff - 3 * sddiff

  #Plot data

  plot(diffs ~ means, xlab = "Average signal", pch=16, col="grey", cex.main=1, cex.lab=1,

       #main=paste0("Bland-Altman analysis of ",l1," and ",l2),

       ylab = paste0("Signal differences (" ,l1," - " ,l2,")"),

       ylim = c(yliml, ylimh), cex.main=1, cex.lab=1, main=title

       #,xaxt='n',

       #yaxt='n'

  )

  #display 0 bias horizontal line

  abline(h=0)

  #display calculated bias line

```

```

abline(h = mdiff, col="blue", lwd=2) # Center line
abline(lm(diffs~means), col="red", lwd=3, lty=3)
# Plot standard deviations lines
abline(h = mdiff + 1.96 * sddiff, lty = 2, lwd=2)
abline(h = mdiff - 1.96 * sddiff, lty = 2, lwd=2)
#display degree of agreement
text(0.25*max(means), ylimh*0.85, label=paste0("Precision:\n",abs(signif(sddiff*1.98, 3))," units"),
cex=1, font=2)
# plotting bias p value
pval <- t.test(diffs, mu=0)$p.value
# strip to 3 significant digits
pval <- signif(pval, 3)
# add asterisk if <0.05
pval <- ifelse(pval<0.001, "< 0.001",
              ifelse(pval<0.01, "< 0.01",
                    ifelse(pval<0.05, "< 0.05", "> 0.05")))
# annotate it near lower left corner
text(0.55*max(means), ylimh*0.85,paste0("Constant error:\n",abs(signif(mdiff,3))," units \n(blue
line)\np ", pval), cex=1, font=2)
# systematic error
systematic<-coef(summary.lm(lm(diffs~means)))[2,1]
pval<- coef(summary.lm(lm(diffs~means)))[2,4]
pval <- ifelse(pval<0.001, "< 0.001",
              ifelse(pval<0.01, "< 0.01",
                    ifelse(pval<0.05, "< 0.05", "> 0.05")))
pval <- paste0("Proportional error:\n",abs(signif(systematic, 3))," units\n(red line)\np ", pval)

```



```
text(0.85*max(means), ylimh*0.85,label=pval, cex=1, font=2)
}
```

```
#####
```

```
#Linear reg function; display accuracy and precision
```

```
assay.metrics <- function(expected, observed, title, ...) {
```

```
  lm1<-lm(observed ~ expected)
```

```
  lm2<-lm(observed ~ expected, offset=1*expected)
```

```
  #calculate prediction intervals
```

```
  newx <- seq(ifelse(min(observed)>min(expected),min(observed), min(expected)),
             ifelse(max(observed)>max(expected),max(observed), max(expected)), 0.1)
```

```
  b <- predict(lm1, newdata=data.frame(expected=newx), interval="prediction")
```

```
  #plot the regression
```

```
  plot(expected, observed, pch=16, col="grey", xlab="Expected", ylab="Observed", main=title,
        cex.main=1, cex.lab=1,
```

```
        xlim=c(min(expected,observed),max(expected,observed)),
```

```
        ylim=c(min(expected,observed),max(expected,observed)))
```

```
  #add expected line
```

```
  abline(0,1,col="black", lwd=2)
```

```
  #add observed line
```

```
  abline(lm1, col="red", lwd=3, lty=3)
```

```
  #add upper and lower prediction interval lines
```

```

lines(newx,b[,2], lty=3, lwd=3, col="black")
lines(newx,b[,3], lty=3, lwd=3, col="black")
#calculate smallest and largest prediction intervals within reportable range:
small.int<-(min(b[,3]-b[,2]))/2
large.int<-(max(b[,3]-b[,2]))/2
#display precision as a range between smallest and largest prediction interval values

text(max(expected)*0.35,
      ifelse(max(observed)>max(expected),max(observed), max(expected)),
      paste0("Precision: ", signif(small.int, 3)," - ", signif(large.int, 3)," units"),
      cex=1, font=2)
#display p value for the accuracy metric
pval<-t.test(observed, expected, paired=TRUE)$p.value
text(max(expected)*0.35,ifelse(max(observed)>max(expected),max(observed), max(expected))*0.9,
      paste0("Constant error: ", abs(signif(mean(observed)-mean(expected),3)), " units (p ",
            ifelse(pval<0.001, "< 0.001",
                  ifelse(pval<0.01, "< 0.01",
                        ifelse(pval<0.05, "< 0.05", "> 0.05"))), ")), cex=1, font=2)
#systematic error (possibly not needed)
pval<-coef(summary.lm(lm2))[2,4]
systematic<-coef(summary.lm(lm1))[2,1]
y.int<-coef(summary.lm(lm1))[1,1]
text(max(expected)*0.35,ifelse(max(observed)>max(expected),max(observed), max(expected))*0.8,
      paste0("Proportional error: ", abs(signif(coef(summary.lm(lm2))[2,1], 3)), " units (p ",
            ifelse(pval<0.001, "< 0.001",

```

```
      ifelse(pval<0.01, "< 0.01",
            ifelse(pval<0.05, "< 0.05", "> 0.05")), "")", cex=1, font=2)
#display equation of the line
text(max(assay1)*0.35,ifelse(max(assay2)>max(assay1),max(assay2), max(assay1))*0.7,
      paste0("SLR: y = ", signif(systematic, 3), "x ",ifelse(y.int<0, "- ",
            ifelse(y.int>0, "+ ")), signif(abs(y.int), 3)), cex=1, font=2)
}
```
